# Supplementary figures and images for: StructMAn: annotation of single-nucleotide polymorphisms in the structural context
Source: PubMed Central journal article supplement — Nucleic Acids Res. 2016 May 5;44(Web Server issue):W463–8. doi: 10.1093/nar/gkw364 (PMC4987916; doi:10.1093/nar/gkw364), 2016-05-05

# Annotation candidate scores, all mutations

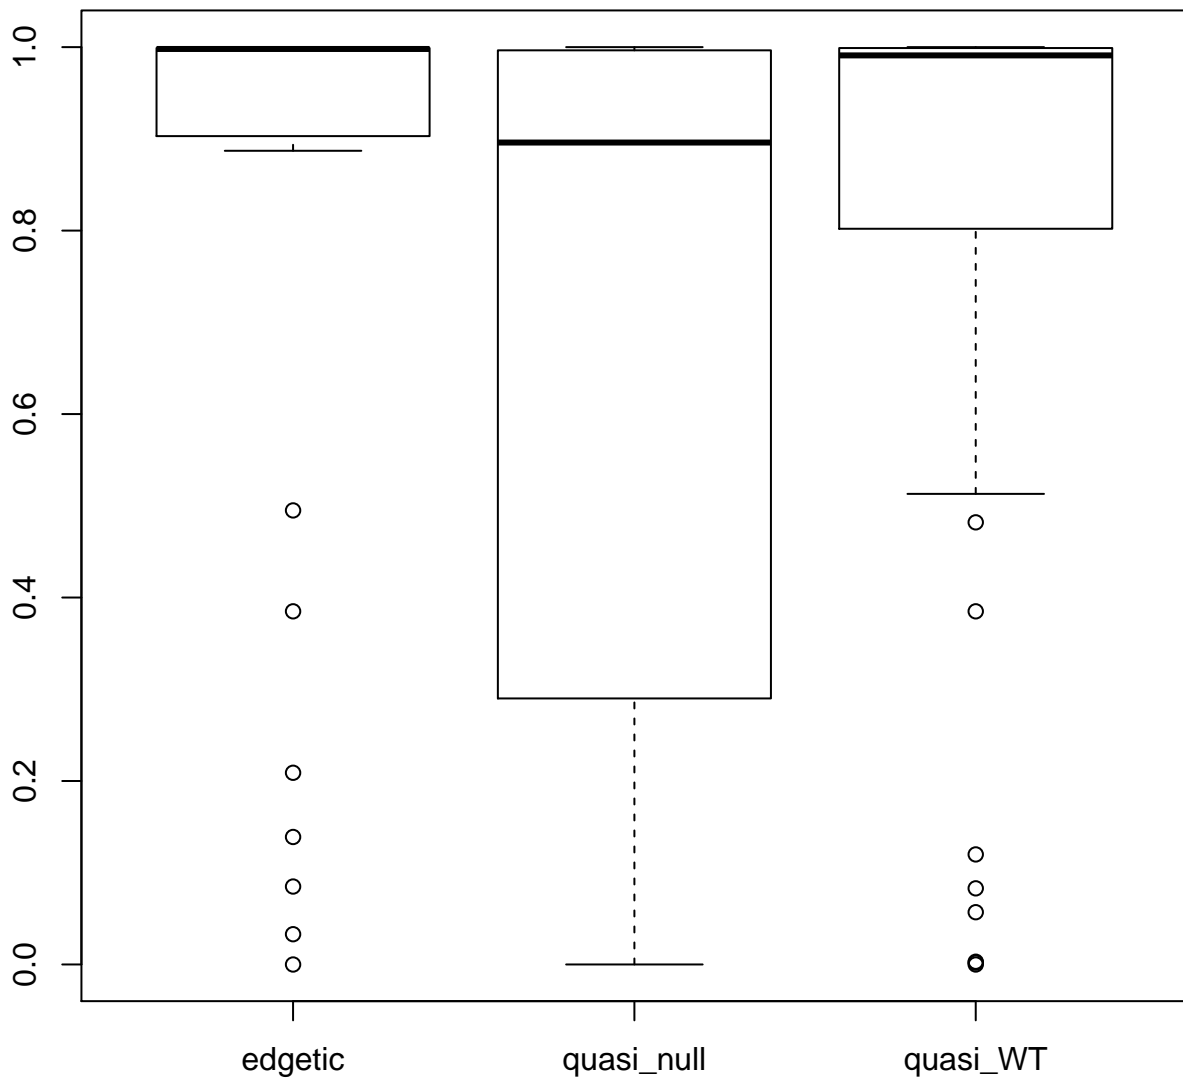

Supplement: supp_gkw364_nar-00457-web-b-2016-File010.pdf [file supp_gkw364_nar-00457-web-b-2016-File010.pdf]

## Interaction scores, all mutations

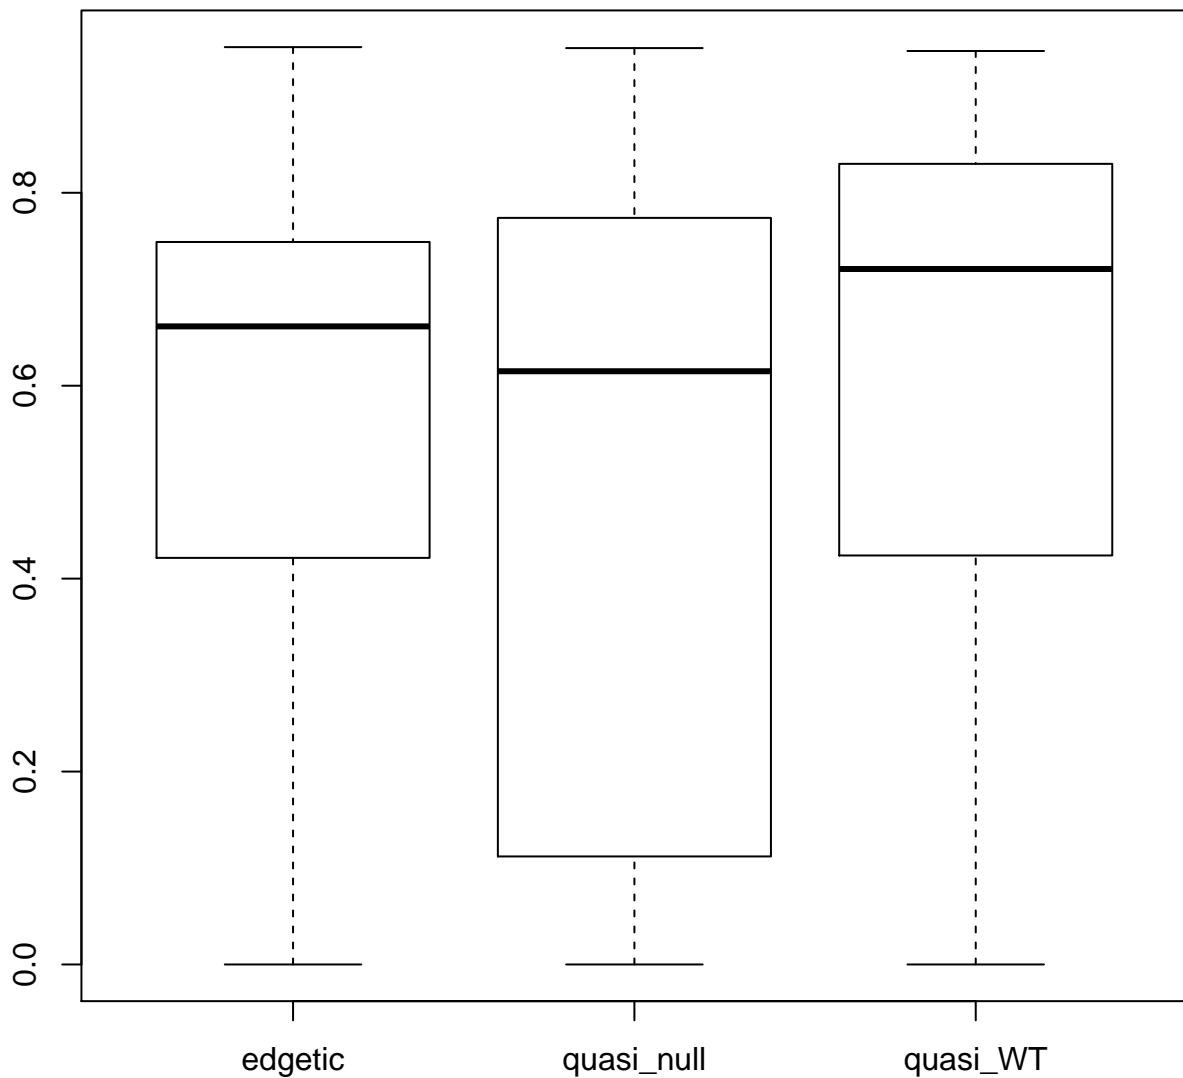

Supplement: supp_gkw364_nar-00457-web-b-2016-File011.pdf [file supp_gkw364_nar-00457-web-b-2016-File011.pdf]

# Interaction scores in PolyPhen-2 categories

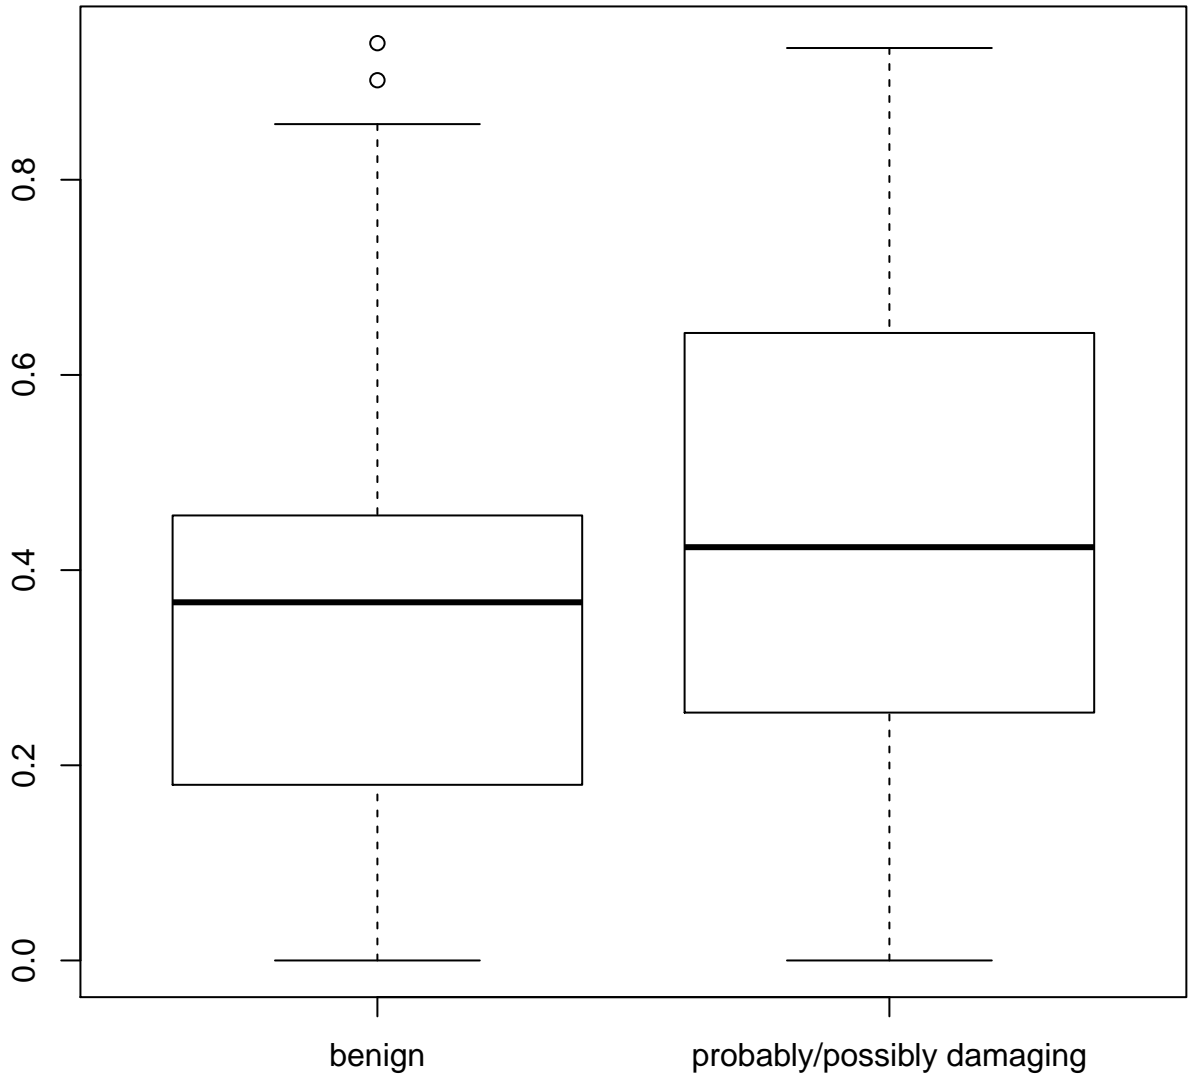

Supplement: supp_gkw364_nar-00457-web-b-2016-File012.pdf [file supp_gkw364_nar-00457-web-b-2016-File012.pdf]
